## 29 Abstract

30 Diffusion magnetic resonance imaging (dMRI) is one of the most prevalent methods to investigate  
31 the micro- and macrostructure of the human brain *in vivo*. Prior to any group analysis, dMRI data are  
32 generally processed to alleviate adverse effects of known artefacts such as signal drift, data noise and  
33 outliers, subject motion, and geometric distortions. These dMRI data processing steps are often  
34 combined in automated pipelines, such as the one of the Human Connectome Project (HCP). While  
35 improving the performance of processing tools has clearly shown its benefits at each individual step  
36 along the pipeline, it remains unclear whether – and to what degree – choices for specific user-  
37 defined parameter settings can affect the final outcome of group analyses. In this work, we  
38 demonstrate how making such a choice for a particular processing step of the pipeline drives the final  
39 outcome of a group study. More specifically, we performed a dMRI group analysis on gender using  
40 HCP data sets and compared the results obtained with two diffusion tensor imaging estimation  
41 methods: the widely used ordinary linear least squares (OLLS) and the more reliable iterative  
42 weighted linear least squares (IWLLS). Our results show that the effect sizes for group analyses are  
43 significantly smaller with IWLLS than with OLLS. While previous literature has demonstrated  
44 higher estimation reliability with IWLLS than with OLLS using simulations, this work now also  
45 shows how OLLS can produce a larger number of false positives than IWLLS in a typical group  
46 study. We therefore highly recommend using the IWLLS method. By raising awareness of how the  
47 choice of estimator can artificially inflate effect size and thus alter the final outcome, this work may  
48 contribute to improvement of the reliability and validity of dMRI group studies.

## 49 1 Introduction

50 Diffusion magnetic resonance imaging (dMRI) has been used extensively to study fundamental  
51 biological concepts (Assaf et al., 2019; Novikov et al., 2019), pathologies of the brain (Cercignani  
52 and Gandini Wheeler-Kingshott, 2019; Lunven et al., 2015; Phillips et al., 2016; Sabia et al., 2017),  
53 and the architectural configuration of white matter (WM) tracts (Catani et al., 2013; David et al.,  
54 2019; Thiebaut de Schotten et al., 2012). As dMRI became more commonly used, there was a need to  
55 improve its reliability for clinical applications (Eierud et al., 2014; Nir et al., 2013; Owen et al.,  
56 2013; Rudie et al., 2013; Schwarz et al., 2013). Methodological developments that contributed to this  
57 improvement are related to cardiac gating (Chang et al., 2005; Kozák et al., 2013), high-field MRI  
58 scanners (Moser et al., 2017), stronger and faster switching MR gradients (McNab et al., 2013;  
59 Setsompop et al., 2013), image reconstruction techniques (Lustig et al., 2007), diffusion model

60 estimation approaches (Collier et al., 2018; Pannek et al., 2012; Tax et al., 2015; Veraart et al.,  
61 2013b), correction strategies for Gibbs-ringing (Kellner et al., 2016; Perrone et al., 2015; Veraart et  
62 al., 2016a), signal drift (Vos et al., 2017), thermal noise (St-Jean et al., 2016; Veraart et al., 2016b)  
63 eddy current distortions (Andersson et al., 2016; Andersson and Sotiropoulos, 2016, 2015), and  
64 susceptibility induced deformations (Andersson et al., 2018, 2003; Graham et al., 2017), among  
65 others.

66 Processing tools are the key contributors in minimizing adverse effects of confounding factors on the  
67 final results. Despite the theoretical benefits of integrating novel methodological developments in the  
68 dMRI processing pipeline, there is no consensus on which settings or algorithms should be preferred  
69 for, for instance, a typical diffusion tensor imaging (DTI) study in which two groups of subjects (e.g.,  
70 healthy controls vs. patients) are compared. This lack of agreement is reinforced by our limited  
71 understanding of whether a specific processing method has a significant contribution to the reliability  
72 of the subsequent group analysis in terms of outcome. In this context, one could state that, in  
73 practice, the added benefit of a particular data correction procedure is nullified if there are other data  
74 aspects with a much higher variability. As an example, the decrease in diffusion parameter estimation  
75 bias due to Gibbs ringing correction may be completely swamped by the high noise levels in low-  
76 SNR dMRI data, obviating the relevance of performing this processing step.

77 In general, the relative improvement of one processing step not only depends on the intrinsic quality  
78 of the data, but also on the performance of the other processing steps used in the dMRI pipeline.  
79 Correcting spatial misalignment across multiple diffusion-weighted images (DWIs) due to subject  
80 motion, for instance, may benefit from preceding denoising of these images. In addition, after the  
81 data has been corrected for artifacts, strategies to further analyze the data (e.g., using fiber  
82 tractography, histograms, ROIs, voxel-based approaches, or network graphs) may have a difference  
83 in sensitivity to the benefit of some of the individual processing steps and potentially generate  
84 differences in the final outcome of a group study.

85 While many steps in a dMRI processing pipeline can be considered as optional, for several diffusion  
86 approaches such as DTI or diffusion kurtosis imaging (DKI), there is the mandatory step of choosing  
87 the diffusion estimation method to obtain model parameters. Over the last decade, a plethora of such  
88 estimators have been used, including ordinary linear least squares (OLLS), non-linear least squares  
89 (NLLS), weighted linear least squares (WLLS), and their constrained, robust and conditional  
90 extensions, among others (Andersson, 2008; Chang et al., 2012, 2005; Collier et al., 2015; Jones and

91 Basser, 2004; Koay et al., 2009; Kristoffersen, 2012, 2007; Salvador et al., 2005; Tax et al., 2015;  
92 Veraart et al., 2013b, 2011). Assuming that data outliers have been identified and removed, a specific  
93 version of the WLLS, iterative WLLS (IWLLS), shows high performance characteristics in terms of  
94 accuracy and precision and may even be preferred over advanced NLLS estimation methods (Veraart  
95 et al., 2013b). Yet, OLLS is still the most widely used estimation method and often defined as the  
96 default in common software tools (e.g., FSL – (Jenkinson et al., 2012)).

97 Similar to the other dMRI processing steps, one can also question the relevance of choosing a  
98 particular diffusion estimation approach. Does it really matter which estimator is used for the final  
99 outcome of a group study? In this work, we address this concern. More specifically, we performed a  
100 dMRI group analysis using Human Connectome Project (HCP) data sets and compared the results  
101 obtained with OLLS and IWLLS. To this end, and without loss of generality, we investigated gender  
102 related differences (Caeyenberghs and Leemans, 2014; Herting et al., 2012; Hsu et al., 2008;  
103 Ingalhalikar et al., 2014; Kanaan et al., 2012; Menzler et al., 2011; Núñez et al., 2017; Tyan et al.,  
104 2017; Westerhausen et al., 2003; Wierenga et al., 2017) to evaluate the potential differences in final  
105 outcomes using the two estimators. Preliminary results of this work were presented at the  
106 International Society for Magnetic Resonance in Medicine (ISMRM) meeting in Toronto, Canada  
107 (David et al., 2015).

## 108 **2 Methods**

### 109 **2.1 Subject data and processing**

110 Minimally preprocessed DWIs were collected from the HCP S500 release (Essen et al., 2012; Glasser  
111 et al., 2013). Briefly, the data consist six separate acquisitions of 90 DWIs acquired with diffusion  
112 weightings (b-values) equal to 1000/2000/3000  $s/mm^2$  and five, six or seven non-DWIs (b-value = 0  
113  $s/mm^2$ ). Every image was acquired with both left-to-right and right-to-left phase encoding directions;  
114 the voxel size was 1.25 mm isotropic. Susceptibility artifacts, eddy current induced distortions, and  
115 subject motion were corrected with the *FSL* tools taking into account any reorientations of the  
116 diffusion gradient orientations (Andersson et al., 2003; Jenkinson et al., 2012; Leemans and Jones,  
117 2009; Sotiropoulos et al., 2013). All datasets were further processed with *ExploreDTI* version 4.8.6.  
118 (Leemans et al., 2009) using two different tensor estimation approaches: (a) OLLS (Basser et al.,  
119 1994) and (b) IWLLS (Veraart et al., 2013b). For this step, only the 90 DWIs with b-value of 1000  
120  $s/mm^2$  and 9 non-DWIs per participant were selected for diffusion tensor estimation. In addition, we

121 also corrected for the gradient nonlinearities in the diffusion-weighted gradients during this  
122 estimation procedure (Bammer et al., 2003; Mesri et al., 2019; Sotiropoulos et al., 2013). Every  
123 participant for which all the 90  $b = 1000$  s/mm<sup>2</sup> images were available, and which was not listed  
124 among the participants with known anatomical anomalies or data quality issues, was included in the  
125 analysis. The complete list of the excluded participants can be found on the appropriate HCP wiki  
126 page (HCP, 2017). The final sample size is 409 participants, consisting of 244 females and 165  
127 males.

## 128 **2.2 Voxel-based analysis**

129 For each subject, fractional anisotropy (FA) maps were calculated from the fitted tensors (using  
130 OLLS and IWLLS) and transformed to the Montreal Neurological Institute (MNI) template via the  
131 native-to-MNI warp files, provided by the HCP team (Fonov et al., 2011). Voxelwise statistical  
132 comparisons of FA between the male and female groups were performed using the permutation  
133 analysis of linear models (PALM) (Holmes et al., 1996; Nichols and Holmes, 2003; Winkler et al.,  
134 2014), a Matlab based open-source toolbox, version alpha104 with 10000 permutations. For all the  
135 tests (next section), calculations are based on nonparametric permutations as this approach was  
136 proven to be more efficient in producing fewer false positives than parametric methods (Eklund et al.,  
137 2016). Significance was determined at  $p_{\text{corr}} < 0.05$  using family-wise error rate (FWER) adjustment  
138 to correct for multiple comparisons after applying threshold-free cluster enhancement (TFCE) (Smith  
139 and Nichols, 2009). Calculation speed was accelerated using the tail approximation (Winkler et al.,  
140 2016). A Dell server with 72 Intel Xeon E7-8870 v3 @ 2.10 GHz dual cores with 1 TB RAM was  
141 used for calculations.

## 142 **2.3 Statistical tests**

### 143 **2.3.1 Effect of tensor estimator**

144 For each participant, there are two FA maps: one obtained from the diffusion tensor estimated with  
145 OLLS and one with IWLLS. In order to investigate the potential differences in FA (regardless of  
146 gender) between the OLLS and IWLLS pipelines, we used a paired two-sample t-test. This procedure  
147 tests whether there is a significant effect of using a different tensor estimation method on FA, without  
148 considering if the participant is female or male.

### 149 **2.3.2 Effect of Gender**

150 Differences in FA values between males and females (denoted as  $FA_m$  and  $FA_f$ ) were investigated  
151 using an unpaired two-sample t-test for the OLLS and IWLLS pipelines separately. A further  
152 correction was applied via the “-corrcon” option in PALM, which accounts for the multiple contrasts  
153 during the FWER correction.

### 154 **2.3.3 Pipeline dependent gender differences**

155 To test whether gender differences depend on the tensor estimation method, we performed a two-  
156 sample t-test on the gender, where the tested variable is the difference in FA, denoted as  $\Delta FA$ ,  
157 between the IWLLS and OLLS pipelines:

$$\Delta FA = FA_{IWLLS} - FA_{OLLS}. \quad (1)$$

158 More specifically, we evaluated with this test whether the  $\Delta FA$  values for males, denoted as  $\Delta FA_m$ ,  
159 differ significantly from the  $\Delta FA$  values for females, denoted as  $\Delta FA_f$ . Statistically, this procedure is  
160 the same as the interaction part of a two-group analysis of variance (ANOVA) test with two levels  
161 per participant. A significant effect means that the gender differences are solely driven by the choice  
162 of estimation method. Independent and symmetric errors were assumed to boost the statistical power  
163 of the test, by using the command “-ise” in PALM. Effect sizes and their distributions were analyzed  
164 in detail within the regions of significance.

### 165 **2.3.4 Effect size**

166 The practical significance of the findings was further evaluated by reporting effect sizes, as suggested  
167 by the American Statistical Association’s (ASA) recent statement on p-values: “A p-value, or  
168 statistical significance, does not measure the size of an effect or the importance of a result.”  
169 (Wasserstein and Lazar, 2016). Accordingly, we used Cohen’s  $d$ , a frequently applied effect size  
170 estimator. Furthermore, because Cohen’s  $d$  is not a robust effect size measure to outliers, skewness,  
171 heavy-tails and the combinations of these factors, the shape differences between the voxelwise  
172 distributions of FA values were studied via the shift function (Rousselet et al., 2017). The 95%  
173 percentile confidence intervals for the decile differences were estimated with a bootstrap estimation  
174 (1000 samples), using the Harrell–Davis estimator (Wilcox, 2012), as implemented in the *Matlab*  
175 *Robust Graphical Methods For Group Comparisons* (matrogme) toolbox, version 0.0.9000  
176 (Rousselet et al., 2017).

## 177 3 Results

### 178 3.1 Effect of tensor estimator

179 Fig. 1 shows the result for the paired t-test that investigates the difference in FA between the OLLS  
180 and IWLLS estimation methods. To further emphasize the differences, we show the effect size (with  
181 Cohen's  $d$ ) only for the voxels that were statistically significant after applying the multiple  
182 comparison correction procedure. The map shows that these differences are significant in the whole  
183 brain and are tissue-dependent. Larger effect sizes were revealed in the core WM, such as in the  
184 corpus callosum (CC), the corticospinal tract (CST), and the optic radiation (OR), where FA values  
185 are relatively high. Areas with lower FA values near the cortical and deep GM regions (thalamus,  
186 hippocampus, putamen, etc.) resulted in no or negligible differences, as expressed by the white areas  
187 in the image that indicate a near zero effect size. Overall, the IWLLS estimator results in significantly  
188 higher FA values in the vast majority of the WM compared to using OLLS.

189 The systematic deviation in FA between OLLS and IWLLS is further highlighted in Fig. 2, where the  
190 FA values are averaged across all 409 subjects. It is clear that for most of the WM voxels ( $\sim$ FA>0.2)  
191 the mean FA values are higher for the IWLLS estimator than for the OLLS estimator.

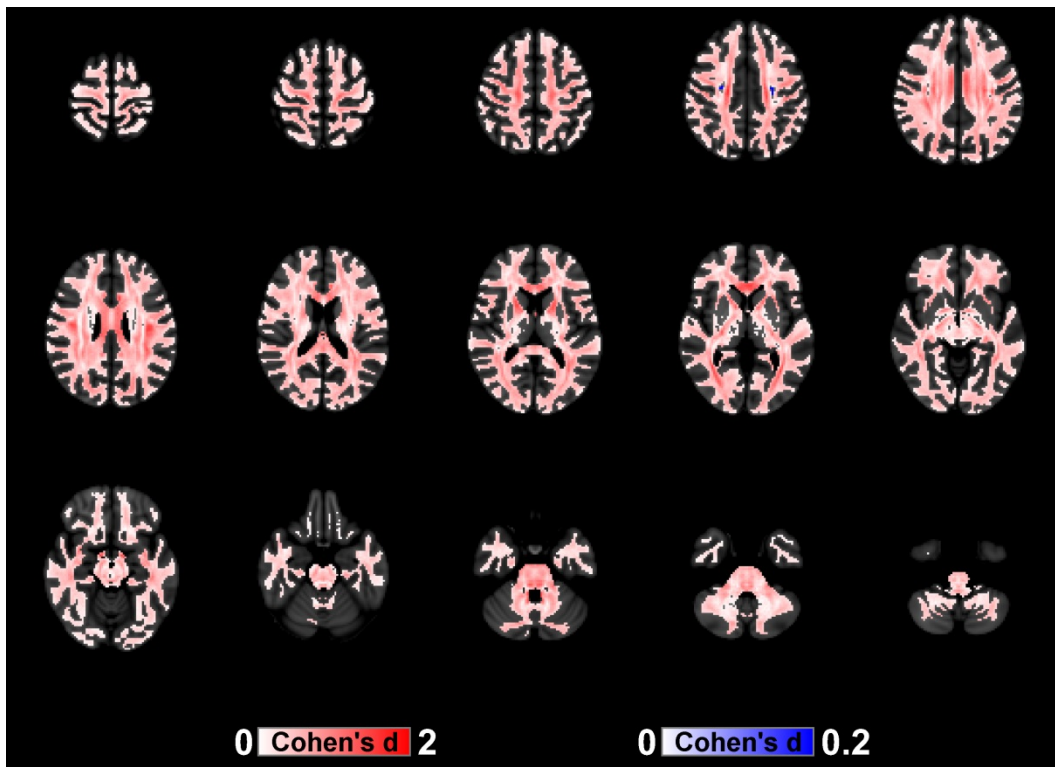

192

193 Fig. 1 Effect sizes (defined as Cohen's  $d$ ) are shown as color maps overlaid on regions with  
194 statistically significant differences in FA between using the IWLLS and OLLS estimators, presented  
195 in MNI space. Notice the different color scale magnitudes for the effect sizes. The reddish and  
196 blueish color bars reflect regions where  $\Delta FA > 0$  and  $\Delta FA < 0$ , respectively (see Eq. 1).  
197 (Radiological view: left on the image is right in the brain and vice versa).



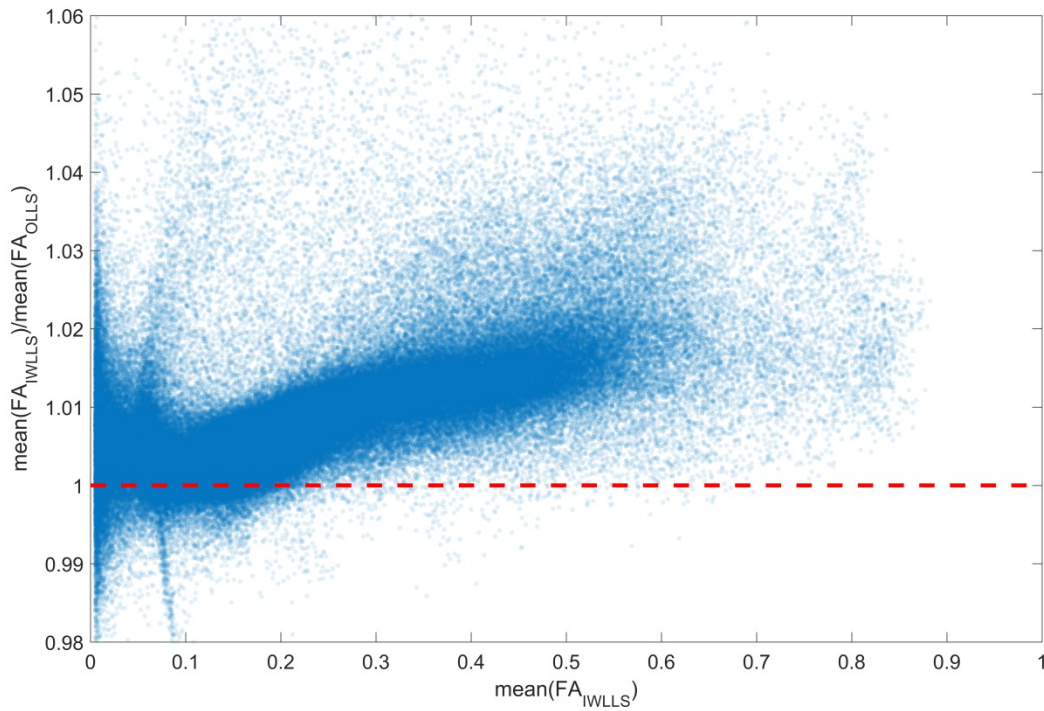

198

199 Fig. 2 Scatterplot of the ratios of the FA values from the IWLLS and OLLS estimators as a function  
200 of FA from the IWLLS estimator. Each point in the scatterplot represents the average FA value  
201 across all 409 subjects for each brain voxel in MNI space. If there was no systematic deviation  
202 between the OLLS and IWLLS estimators, the points should be located around the unity value,  
203 indicated by the red dashed line.

204 **3.2 Effect of gender**

205 Fig. 3 shows the result of the voxelwise two-sample t-tests for both the OLLS and the IWLLS  
206 estimator, indicating the regions where  $FA_f > FA_m$  with  $p_{\text{corr}} < 0.05$ . The results of the opposite tests,  
207 that is, the regions where  $FA_m > FA_f$  with  $p_{\text{corr}} < 0.05$ , are shown for both OLLS and IWLLS in  
208 Suppl. Fig. 1. Note that the overlap itself of the two tests does not necessarily indicate identical  
209 results. In addition, the lack of overlap is not indicative of a difference in outcome between the OLLS  
210 and IWLLS results. At this stage, the results merely illustrate that there is general agreement in  
211 spatial overlap of the regions that were deemed significant in terms of FA based gender differences.

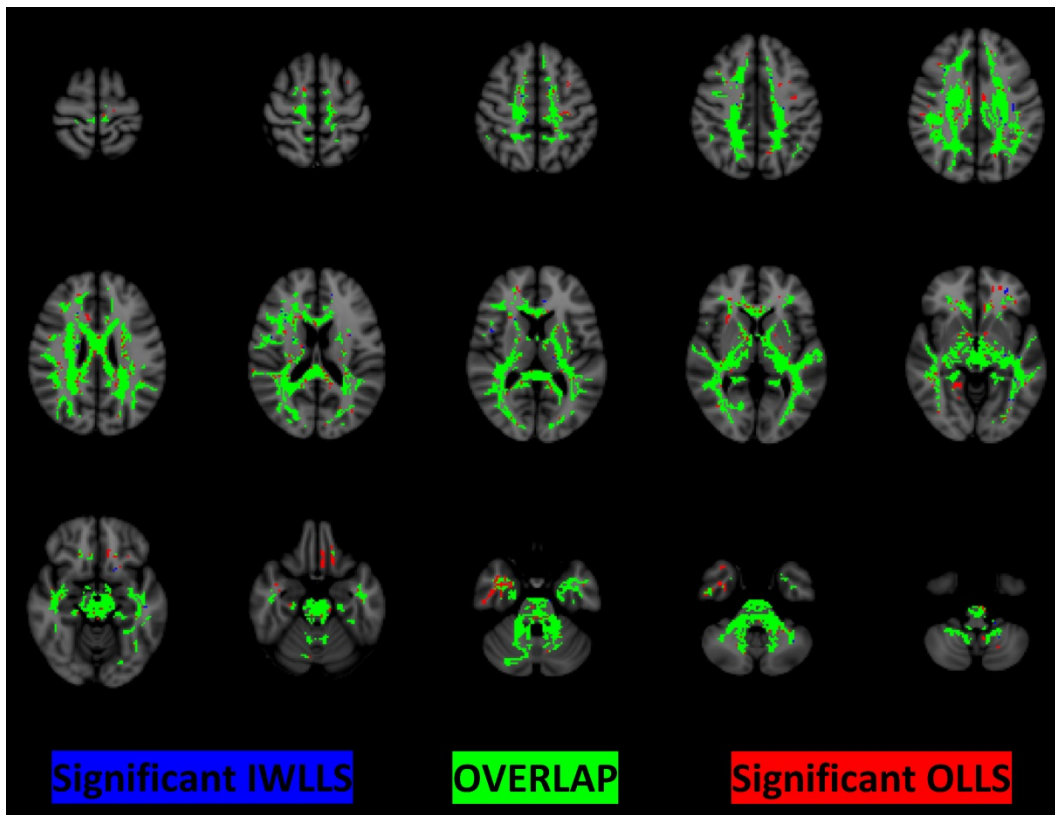

212

213 Fig. 3 Results of the voxelwise analysis, indicating the regions where FA is significantly higher for  
214 females than males. Voxels colored in red and blue represent the regions where FA estimates were  
215 obtained with OLLS and IWLLS, respectively. The green voxels show their overlap, i.e., the regions  
216 where both OLLS and IWLLS reflect significantly higher FA values for females than for males.  
217 (Radiological view: left on the image is right in the brain and vice versa).

### 218 3.3 Pipeline dependent gender differences

219 Fig. 4 shows to which extent gender-based FA differences are driven by the choice of estimator (i.e.,  
220 using OLS or IWLLS). Overall, gender differences depend on the choice of estimator mainly in the  
221 following areas with  $p_{\text{corr}} < 0.05$ : parts of the CC and brainstem for  $\Delta FA_m > \Delta FA_f$  and parts of the  
222 CST for  $\Delta FA_f > \Delta FA_m$ . To get a more detailed insight into the effect of estimation choice on the  
223 observed gender-based FA differences, we investigate the four possible scenarios ( $FA_f > FA_m$  or  $FA_m$   
224  $> FA_f$  in regions where  $\Delta FA_m > \Delta FA_f$  or  $\Delta FA_f > \Delta FA_m$ ) in the following subsections.

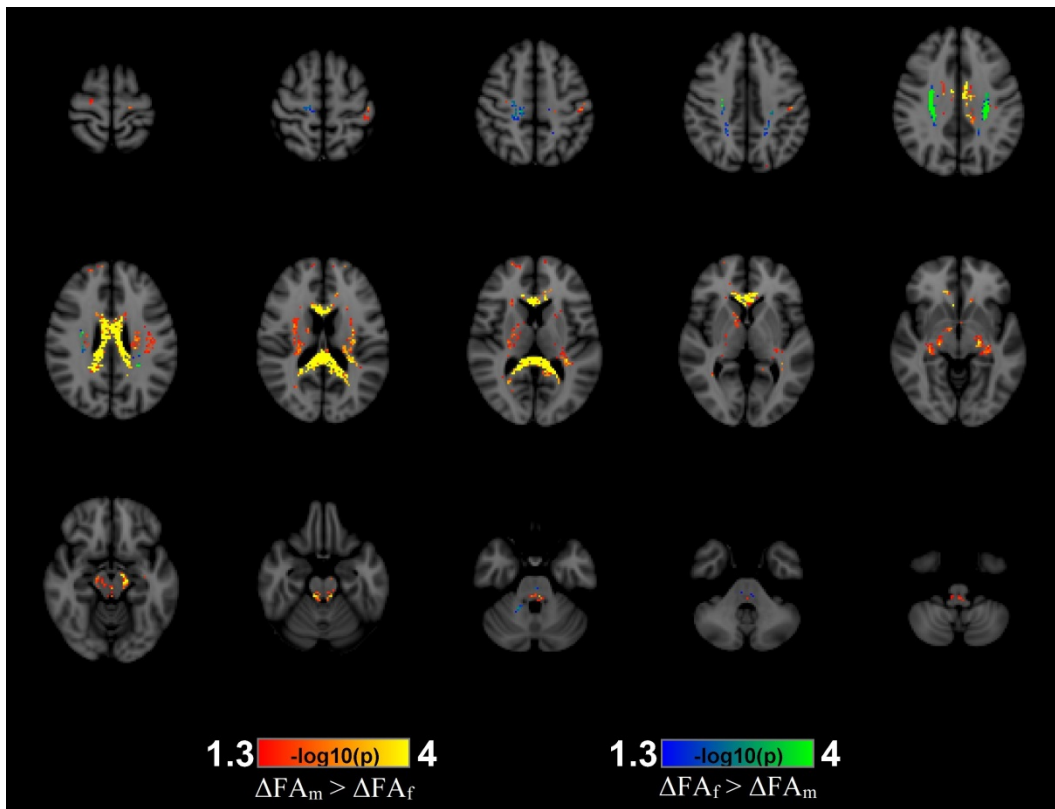

Fig. 4 Significance maps are shown for the interaction of estimator choice with gender-based FA differences. To enhance the contrast for significance, color-encoding is according to  $-\log_{10}(\text{p-value})$  with minimum and maximum values of  $-\log_{10}(0.05) \approx 1.3$  and  $-\log_{10}(1/10000) = 4$  (1/10000 is the smallest achievable p-value with 10000 permutations), respectively. The difference in color encoding reflects how the choice of estimator can drive the gender-based FA difference in opposite directions, i.e.,  $\Delta\text{FA}_m > \Delta\text{FA}_f$  (red-to-yellow coloring) and  $\Delta\text{FA}_f > \Delta\text{FA}_m$  (blue-to-green coloring). (Radiological view: left on the image is right in the brain and vice versa).

233 **3.3.1 Scenario 1:  $FA_f > FA_m$  in regions of  $\Delta FA_m > \Delta FA_f$**

234 Fig. 5 a) shows the area of investigation. The generality of the estimator-induced bias can be seen on  
235 Fig. 5 b), which shows the differences of the effect sizes as a function of OLLS-based effect sizes.

236 To get a better insight into the underlying effect of how estimator choice can drive gender-based FA  
237 differences, we explicitly show the data points of all participants for a single voxel. To showcase this  
238 effect, we performed a detailed analysis for the voxel in which the effect size of the  $FA_f > FA_m$  test  
239 decreased the most, when the estimation was changed from OLLS to IWLLS (Fig. 6). MNI  
240 coordinates of this voxel, located in the midsagittal plane of the splenium, are:  $x = 0$ ;  $y = -38$ ;  $z = 16$ .  
241 Figs. 6 a) and b) show the distribution of FA values from all subjects in the given voxel when using  
242 the OLLS ( $FA_{OLLS}$ ) and IWLLS ( $FA_{IWLLS}$ ) estimators, respectively. The effect size is lower for  
243 IWLLS than for OLLS: Cohen's  $d$  decreased from 0.49 to 0.34. By investigating the  $FA_{IWLLS} /$   
244  $FA_{OLLS}$  ratios (Fig. 6 c)), it can be readily seen that  $FA_m$  increased more than  $FA_f$  when changing the  
245 estimator from IWLLS to OLLS. The  $FA_m - FA_f$  difference is plotted for each decile with the  
246 bootstrapped confidence intervals as a function of male deciles, indicating that the increase in  $FA_m$   
247 was systematically larger than the increase in  $FA_f$  by 0.5-2% due to this change (Fig. 6 d)). Note that  
248 if a confidence interval does not include zero, one may also conclude that said difference is  
249 significant between the changes of these ratios.

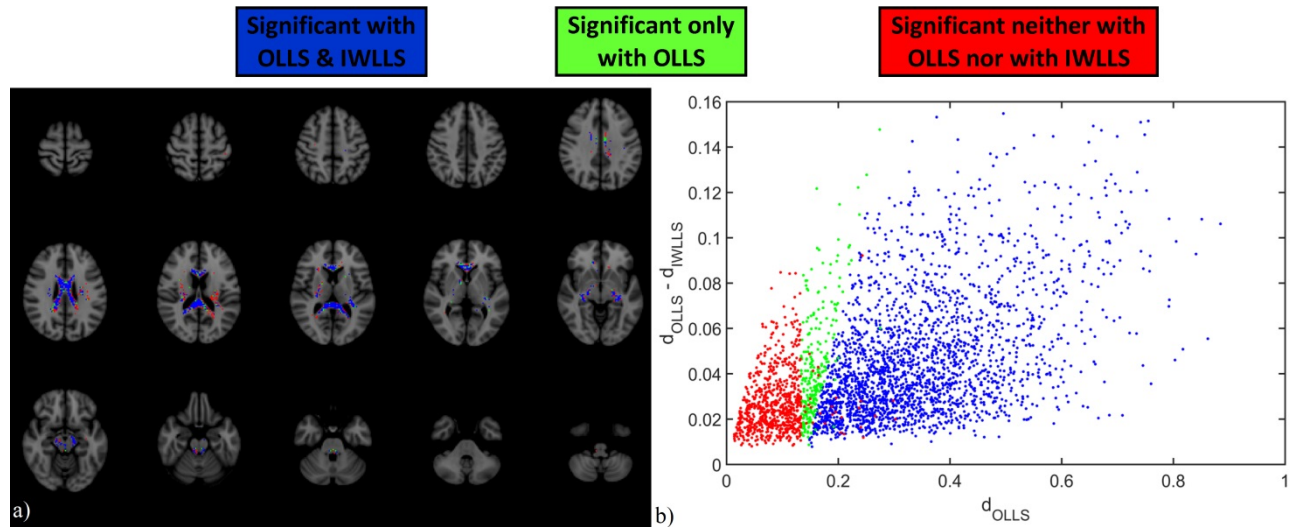

250

251 Fig. 5. a) The spatial distribution of the voxels in MNI space, where males have a significantly larger  
252  $\Delta\text{FA}$  than females and where  $\text{FA}_f > \text{FA}_m$ , regardless of whether the test was significant or not with  
253 any of the estimators. There were no voxels where the IWLLS-based  $\text{FA}_f > \text{FA}_m$  test was significant,  
254 while the OLLS-based was not. b) Scatterplot of the difference in effect sizes between OLLS ( $d_{\text{OLLS}}$ )  
255 and IWLLS ( $d_{\text{IWLLS}}$ ) based effect sizes as a function of  $d_{\text{OLLS}}$ . (Radiological view: left on the image is  
256 right in the brain and vice versa).

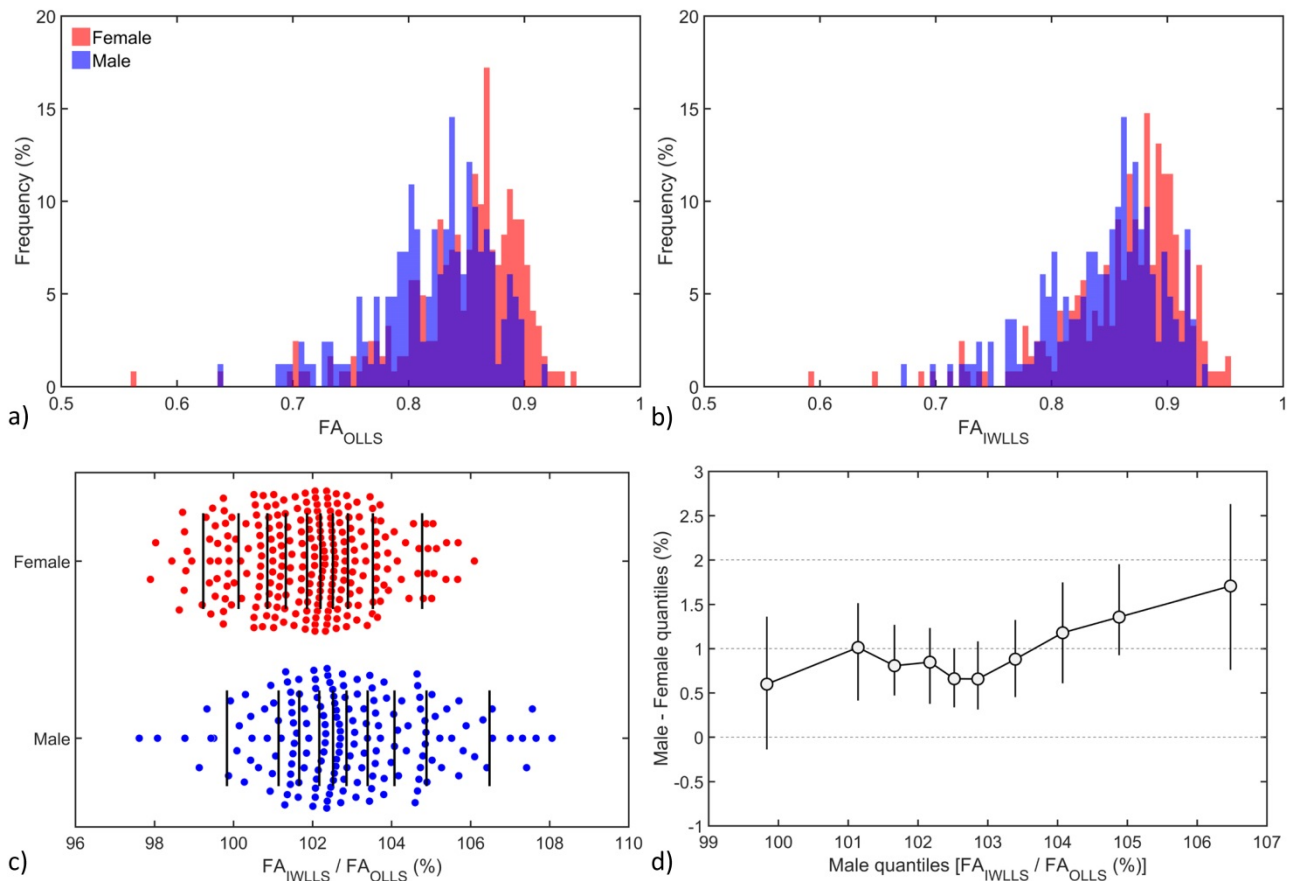

257

258 Fig. 6 The FA distribution for males (blue) and females (red) for OLLS (a) and IWLLS (b),  
 259 respectively, in a voxel located in the corpus callosum (CC), where the effect size decreased the most  
 260 from  $d_{OLLS} = 0.49$  to  $d_{IWLLS} = 0.34$ . c) The ratio of  $FA_{IWLLS} / FA_{OLLS}$  per gender, with the vertical  
 261 lines indicating the deciles. d) The quantile differences between males and females for the ratios  
 262 shown in panel c).



263 **3.3.2 Scenario 2:  $FA_f > FA_m$  in regions of  $\Delta FA_f > \Delta FA_m$**

264 Fig. 7 a) shows the area of investigation. The generality of the estimator-induced bias can be seen on  
265 Fig. 7 b), which shows the differences of the effect sizes as a function of IWLLS-based effect sizes.

266 Fig. 8 shows the detailed analysis for the voxel in which the effect size of the  $FA_f > FA_m$  test  
267 increased the most, when the estimation was changed from OLLS to IWLLS. MNI coordinates of the  
268 voxel, located in the superior longitudinal fasciculus (SLF), are:  $x = 28$ ;  $y = -20$ ;  $z = 36$ . Figs. 8 a)  
269 and b) show the distribution of FA values from all subjects in the given voxel when using the OLLS  
270 ( $FA_{OLLs}$ ) and IWLLS ( $FA_{IWLLs}$ ) estimators, respectively. The effect size is higher for IWLLS than  
271 for OLLS: Cohen's  $d$  increased from 0.19 to 0.27. Fig. 8 c) shows the  $FA_{IWLLs} / FA_{OLLs}$  ratios per  
272 gender, indicating that  $FA_f$  increased more than  $FA_m$  when changing the estimator from IWLLS to  
273 OLLS. Fig. 8 d) shows the shift function. The  $FA_m - FA_f$  difference is plotted for each decile with the  
274 bootstrapped confidence intervals as a function of male deciles, indicating that the increase in  $FA_f$   
275 over  $FA_m$  was larger with 1-2%, except in the highest decile, where FA increased nearly at the same  
276 rate. Note that if a confidence interval does not include zero, one may also conclude that said  
277 difference is significant between the changes of these ratios.

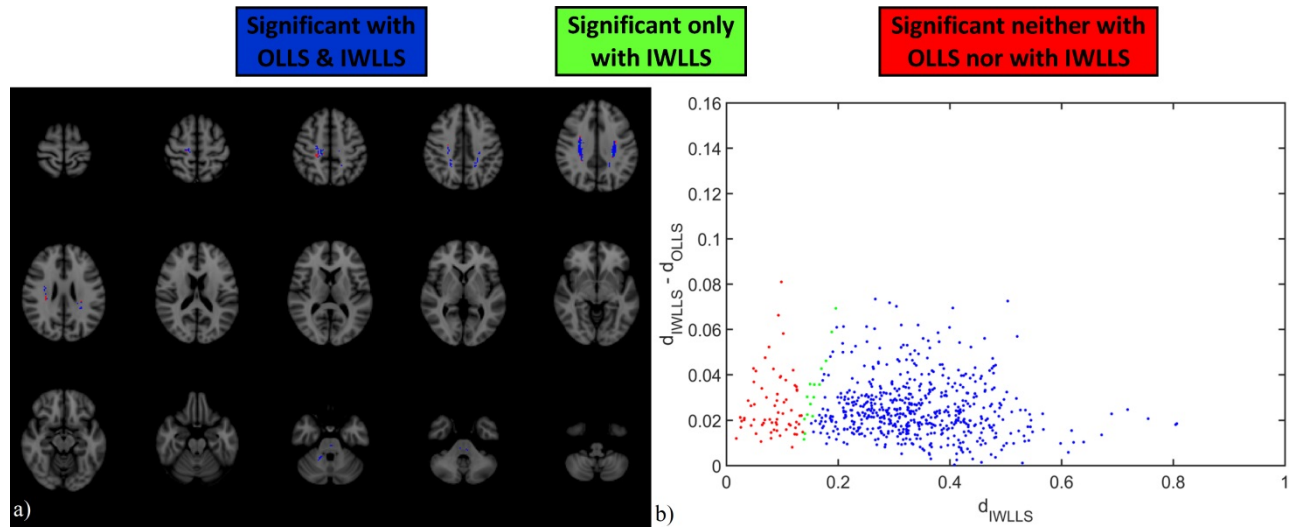

278

279 Fig. 7 a) shows the spatial distribution of the voxels in MNI space, where females have a  
280 significantly larger  $\Delta FA$  than males and where  $FA_f > FA_m$ , regardless of whether the test was  
281 significant or not with any of the estimators. There were no voxels where the OLS-based  $FA_f >$   
282  $FA_m$  test was significant, while the IWLLS-based was not. b) Scatterplot of the difference in effect  
283 sizes between OLS ( $d_{OLS}$ ) and IWLLS ( $d_{IWLLS}$ ) based effect sizes as a function of  $d_{IWLLS}$ .  
284 (Radiological view: left on the image is right in the brain and vice versa).

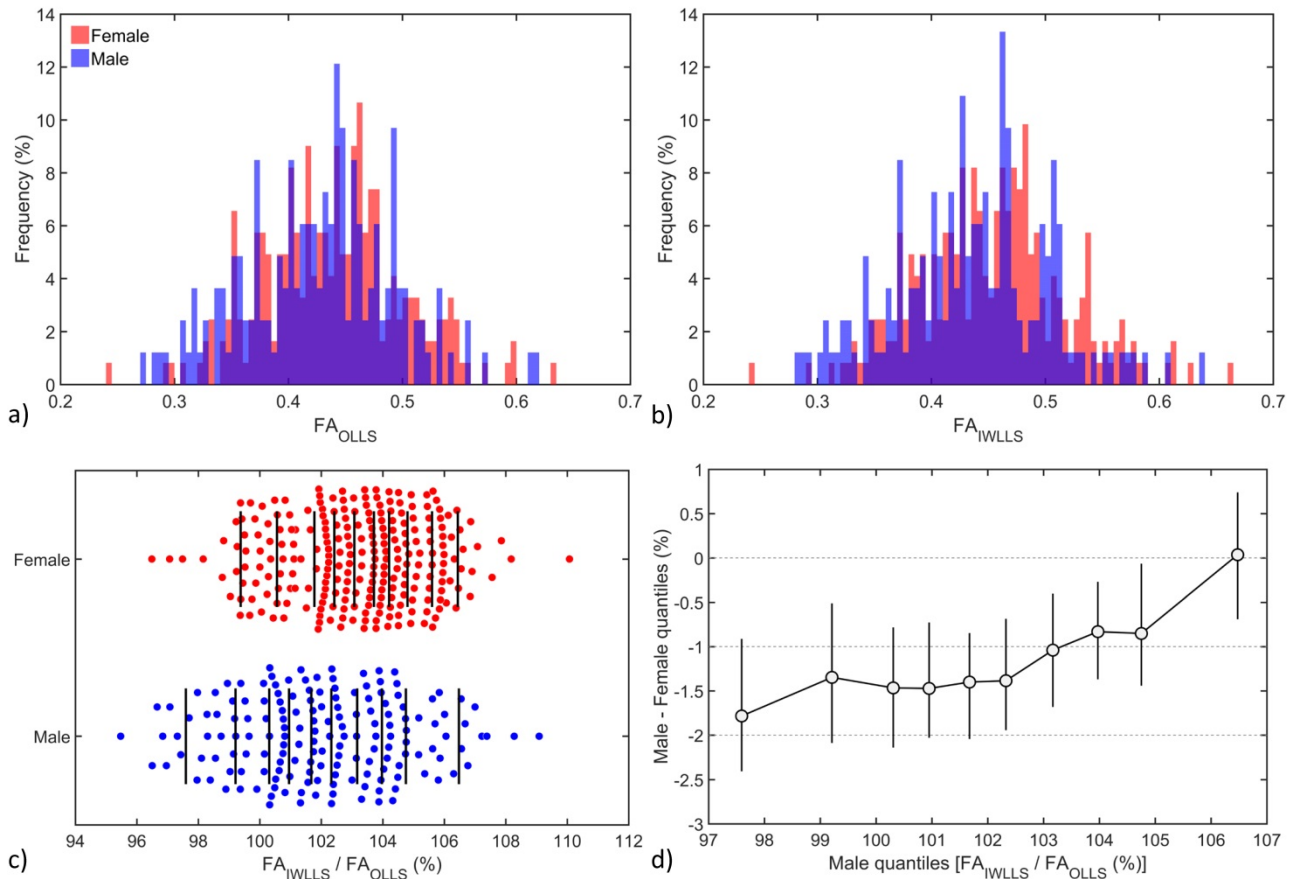

285  
 286 Fig. 8 The FA distribution for males (blue) and females (red) for OLLS (a) and IWLLS (b),  
 287 respectively, in a voxel located in the superior longitudinal fasciculus (SLF), where the effect size  
 288 increased the most from  $d_{OLLS} = 0.19$  to  $d_{IWLLS} = 0.27$ . c) The ratio of  $FA_{IWLLS} / FA_{OLLS}$  per gender,  
 289 with the vertical lines indicating the deciles. d) The quantile differences between males and females  
 290 for the ratios shown in panel c).

291 **3.3.3 Scenario 3:  $FA_m > FA_f$  in regions of  $\Delta FA_m > \Delta FA_f$**

292 Males have a smaller area where  $FA_m > FA_f$ , therefore the area where estimators could have any  
293 effect is also smaller compared to females. The area of investigation is located where  $\Delta FA_m > \Delta FA_f$   
294 is significant, as shown in Fig. 4, but within that region it is limited to voxels where  $FA_m > FA_f$ . Fig.  
295 9 shows the differences of the effect sizes as a function of IWLLS-based effect sizes. For the sake of  
296 simplicity, the spatial distribution of the voxels in MNI space is not shown.

297

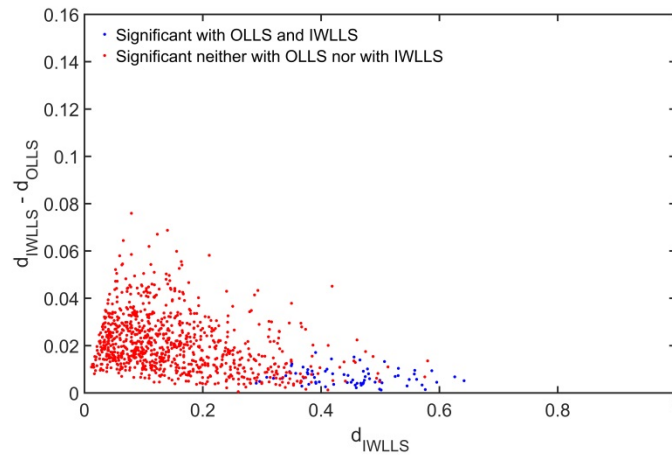

298

299 Fig. 9 Scatterplot of the difference in effect sizes between OLLS ( $d_{OLLs}$ ) and IWLLS ( $d_{IWLLs}$ ) based  
300 effect sizes as a function of  $d_{IWLLs}$ , where males have a significantly larger  $\Delta FA$  than females and  
301 where  $FA_m > FA_f$ .

302 **3.3.4 Scenario 4:  $FA_m > FA_f$  in regions of  $\Delta FA_f > \Delta FA_m$**

303 The area of investigation is located where  $\Delta FA_f > \Delta FA_m$  is significant, as shown in Fig. 4, but within  
304 that region is limited to voxels where  $FA_m > FA_f$ . Fig. 10 shows the differences of the effect sizes as  
305 a function of OLLS-based effect sizes. For the sake of simplicity, the spatial distribution of the  
306 voxels in MNI space is not shown.

307

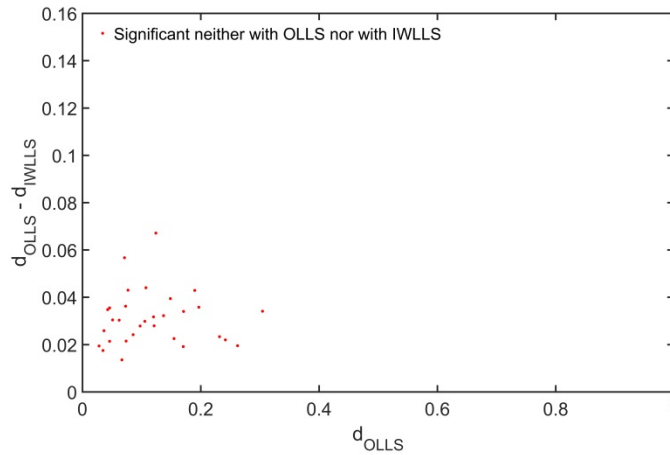

308

309 Fig. 10 Scatterplot of the difference in effect sizes between OLLS ( $d_{OLLS}$ ) and IWLLS ( $d_{IWLLS}$ ) based  
310 effect sizes as a function of  $d_{OLLS}$ , where females have a significantly larger  $\Delta FA$  than males and  
311 where  $FA_m > FA_f$ .

## 312 4 Discussion

313 In this work, we investigated how making a different choice for a specific data processing step can  
314 affect the outcome in a typical DTI group study. More specifically, we performed a voxel-based  
315 analysis, comparing FA values between males and females using HCP data, and revealed that a  
316 higher effect size was obtained with the OLLS diffusion tensor estimator than with its IWLLS  
317 counterpart. If we consider that the IWLLS estimator has a higher accuracy, we can conclude that  
318 OLLS overestimates the observed FA based gender differences. With the majority of published DTI  
319 studies having used the OLLS estimator, it is not hard to imagine that the lack of general agreement  
320 in findings for several research topics (both in neuroscience and clinical applications) could also be  
321 partly attributed to the higher number false positives introduced by the OLLS estimator as compared  
322 with the IWLLS estimator. In the following paragraphs, we will discuss how our findings relate with  
323 what is known in functional MRI (fMRI) and we will place our results in the context of other dMRI  
324 studies.

325 The term ‘blobology’ (Poldrack, 2012) corresponds to the colorful patches, the ‘blobs’, of fMRI  
326 brain studies, summarizing the localization of the results after processing and statistical thresholding.  
327 The phrase reflects an inherent frustration within the neuroimaging community, partly due to the lack  
328 of effect size reports. In dMRI studies, unfortunately, effect sizes are rarely reported. Researchers  
329 often spend most of their efforts on reporting statistically significant results from the data, while the  
330 extent of these effects, which is highly complementary, is hardly considered.

331 With large databases like ADNI ( $n > 2000$ ) (Mueller et al., 2005), ENIGMA ( $n > 10000$ ) (Thompson  
332 et al., 2014), HCP ( $n = 1200$ ), UK BioBank (final  $n = 100000$ ) (Sudlow et al., 2015), or the Whitehall  
333 study ( $n = 6035$ ) (Filippini et al., 2014), the challenges are shifting toward huge sample sizes to allow  
334 the detection of small effects, which otherwise could not be identified (Smith and Nichols, 2018). But  
335 even for group studies based on these cohorts, not properly processing the data according to best  
336 practices may still result in biases that will affect the reliability of the final outcome measures.  
337 Thompson et al. (Thompson et al., 2016) reached a similar conclusion in relation to the genome-  
338 connectome association in the ENIGMA project: “... *Clearly, the ability to pursue such an approach*  
339 *on a large scale, within ENIGMA, depends on several factors: a working group, ENIGMA-DTI, was*  
340 *set up to assess its feasibility. First, unless diffusion-weighted MRI measures show greater genetic*  
341 *effect sizes than other traits assessed so far, there must be tens of thousands of DTI scans available*  
342 *from people with GWAS for such a study to be well powered ...”.*

343 processing protocol (ENIGMA DTI protocol, 2018), the OLLS estimator is used via the *FSL* toolbox  
344 *dtifit*. In all of the aforementioned large-scale cohorts (ADNI, HCP, UK BioBank, Whitehall study),  
345 OLLS is also used which, in light of our findings, may adversely affect the reliability of the final  
346 outcome in a group study. Generally, lower-quality dMRI data in terms of effective SNR or CNR  
347 benefit more from using an estimator with better performance characteristics such as the IWLLS  
348 approach (Veraart et al., 2013a, 2013b). In this work, we used HCP data, which are among the  
349 highest quality data available in current large-scale cohorts (Bastiani et al., 2019). Given the lower  
350 number of DWIs, the lower SNR and CNR, and the higher amount of physiological artifacts in more  
351 conventional neuroimaging studies, especially in a clinical setting, one can expect even more inflated  
352 effect sizes by using the OLLS estimator than those observed in this work.

353 In this work, we carried out the voxelwise analysis with the Statistical Parametric Mapping (SPM)  
354 toolbox (Penny et al., 2007), rather than with another common approach, i.e. tract-based spatial  
355 statistics (TBSS) (Smith et al., 2006). While our results in this manuscript would be conceptually the  
356 same when using TBSS, confounds may arise from the skeletonization step, which may be different  
357 between the OLLS and the IWLLS. Differences in their local FA maxima could then affect statistical  
358 analysis and may further complicate interpretation of the outcome (Bach et al., 2014). Assuming the  
359 same skeleton could be provided for both datasets, e.g., via the overlap and the fusion of the  
360 skeletons, there is no reason to consider that the results presented in this work would be significantly  
361 different.

362 Researchers often justify the choices made for specific processing steps in their data processing  
363 pipeline by referring to previously peer-reviewed studies, which used the same settings or  
364 algorithms, despite the availability of more reliable alternatives. In addition, as OLLS generates  
365 an artificially higher effect size than IWLLS, it stimulates the positive bias in publications  
366 (Rothstein et al., 2006) and contributes to “the natural selection of bad science” (Smaldino and  
367 McElreath, 2016). To some extent, following the implementation of “registered reports” may  
368 mitigate this concern as the processing pipeline can be reviewed and scrutinized before starting  
369 the actual analysis (Nosek and Lakens, 2014).

370 In a recent review paper by Poldrack et al. (Poldrack et al., 2017) the lack of common consensus in  
371 processing and analysis was showcased for fMRI. With common fMRI software packages, it was  
372 shown that the number of possible analysis workflows can be as much as 69,120. For DTI, it is not  
373 hard to achieve the same order of magnitude for this number of workflows given the vast amount of

374 options and parameter settings one can think of. In this work, we specifically investigated the effect  
375 of choosing between the OLLS and the IWLLS estimator on the outcome of the analysis, as using a  
376 diffusion tensor estimator is mandatory. Other processing steps, such as denoising and correcting for  
377 artifacts are not per se necessary (although highly recommended, of course) to continue with  
378 performing an actual group study. In this context, there may be several aspects of a typical processing  
379 or analysis workflow for DTI that may result in much larger effects than shown in this work.

380 Eklund et al. (Eklund et al., 2016) used resting-state fMRI to obtain “null data”, i.e., truly negative  
381 data, to test the false-positive ratios for task fMRI. Unfortunately, for DTI, such an experimental  
382 testing setup to evaluate statistical inferences related to methodological factors is not trivial.  
383 However, without loss of generality, in this work, we performed a standard group study on gender as  
384 the framework to evaluate the effect of using different diffusion tensor estimation approaches. We  
385 used HCP data because of the excellent data quality and the large number of subjects with proper  
386 male-female balance, thereby eliminating issues related to small sample size and low power during  
387 statistical inference (Button et al., 2013).

388 In this work, we did not opt for analyzing the “statistical” significance (i.e., p-values) of our findings,  
389 but rather considered the difference in effect sizes that can be observed. In a similar context, shifting  
390 the focus from p-values to effect sizes was also recently presented by Ritchie et al. (Ritchie et al.,  
391 2018). They compared volumes and DTI based metrics of cortical, subcortical, and WM regions  
392 between females and males from the UK BioBank for more than 5000 participants. The comparison  
393 of the right CST revealed that males have larger FA values than females, with a p-value of  $4 \times 10^{-65}$   
394 using Cohen’s  $d = 0.54$ . After adjusting for total brain volume, the values changed to  $8 \times 10^{-12}$  with  
395 Cohen’s  $d = 0.22$ . While these p-values are indeed *very* significant, they do not contain any useful  
396 information. On the other hand, the effect size measures provide more practical information. That is,  
397 adding another 5000 or more participants to the analysis will not result in any meaningful change in  
398 terms of the effect size, as this investigation is already statistically well-powered, while the p-value  
399 would decrease further. For the same reason, i.e., avoiding under-powered study design, we used  
400 HCP data for our group comparison, allowing us to focus on the performance of the DTI estimators.

401 Despite the efforts of optimizing the dMRI processing pipeline, it is often not clear what the benefits  
402 are of new developments for group-based studies. In this work, however, we showed that the  
403 application of IWLLS should be preferred over the OLLS for diffusion tensor estimation. The current  
404 framework can be easily extended to examine effects of modifying other processing elements, but



405 also to investigate choices in algorithms and settings for specific analysis strategies, like tractography  
406 and connectomics, further improving the reliability and validity of future dMRI group studies.

## 407 **5 Conflict of Interest**

408 The authors declare that the research was conducted in the absence of any commercial or financial  
409 relationships that could be construed as a potential conflict of interest.

## 410 **6 Funding**

411 The research of S.D., H. Y. M. and A.L. is supported by VIDI Grant 639.072.411 from the  
412 Netherlands Organization for Scientific Research (NWO).

## 413 **7 References**

414 Andersson, J.L.R., 2008. Maximum a posteriori estimation of diffusion tensor parameters using a  
415 Rician noise model: Why, how and but. *Neuroimage* 42, 1340–1356.  
416 <https://doi.org/10.1016/j.neuroimage.2008.05.053>

417 Andersson, J.L.R., Graham, M.S., Drobnyak, I., Zhang, H., Campbell, J., 2018. Susceptibility-  
418 induced distortion that varies due to motion: Correction in diffusion MR without acquiring  
419 additional data. *Neuroimage* 171, 277–295. <https://doi.org/10.1016/j.neuroimage.2017.12.040>

420 Andersson, J.L.R., Graham, M.S., Zsoldos, E., Sotiropoulos, S.N., 2016. Incorporating outlier  
421 detection and replacement into a non-parametric framework for movement and distortion  
422 correction of diffusion MR images. *Neuroimage* 141, 556–572.  
423 <https://doi.org/10.1016/j.neuroimage.2016.06.058>

424 Andersson, J.L.R., Skare, S., Ashburner, J., 2003. How to correct susceptibility distortions in spin-  
425 echo echo-planar images: Application to diffusion tensor imaging. *Neuroimage* 20, 870–888.  
426 [https://doi.org/10.1016/S1053-8119\(03\)00336-7](https://doi.org/10.1016/S1053-8119(03)00336-7)

427 Andersson, J.L.R., Sotiropoulos, S.N., 2016. An integrated approach to correction for off-resonance  
428 effects and subject movement in diffusion MR imaging. *Neuroimage* 125, 1063–1078.  
429 <https://doi.org/10.1016/j.neuroimage.2015.10.019>

430 Andersson, J.L.R., Sotiropoulos, S.N., 2015. Non-parametric representation and prediction of single-  
431 and multi-shell diffusion-weighted MRI data using Gaussian processes. *Neuroimage* 122, 166–  
432 176. <https://doi.org/10.1016/j.neuroimage.2015.07.067>

433 Assaf, Y., Johansen-Berg, H., Thiebaut de Schotten, M., 2019. The role of diffusion MRI in  
434 neuroscience. *NMR Biomed.* 32, e3762. <https://doi.org/10.1002/nbm.3762>

435 Bach, M., Laun, F.B., Leemans, A., Tax, C.M.W., Biessels, G.J., Stieltjes, B., Maier-Hein, K.H.,  
436 2014. Methodological considerations on tract-based spatial statistics (TBSS). *Neuroimage* 100,  
437 358–369. <https://doi.org/10.1016/j.neuroimage.2014.06.021>

- 438 Bammer, R., Markl, M., Barnett, A., Acar, B., Alley, M.T., Pelc, N.J., Glover, G.H., Moseley, M.E.,  
439 2003. Analysis and generalized correction of the effect of spatial gradient field distortions in  
440 diffusion-weighted imaging. *Magn. Reson. Med.* 50, 560–569.  
441 <https://doi.org/10.1002/mrm.10545>
- 442 Basser, P.J., Mattiello, J., LeBihan, D., 1994. MR diffusion tensor spectroscopy and imaging.  
443 *Biophys. J.* 66, 259–267. [https://doi.org/10.1016/S0006-3495\(94\)80775-1](https://doi.org/10.1016/S0006-3495(94)80775-1)
- 444 Bastiani, M., Cottaar, M., Fitzgibbon, S.P., Suri, S., Alfaro-Almagro, F., Sotiropoulos, S.N., Jbabdi,  
445 S., Andersson, J.L.R., 2019. Automated quality control for within and between studies diffusion  
446 MRI data using a non-parametric framework for movement and distortion correction.  
447 *Neuroimage* 184, 801–812. <https://doi.org/10.1016/j.neuroimage.2018.09.073>
- 448 Button, K.S., Ioannidis, J.P.A., Mokrysz, C., Nosek, B.A., Flint, J., Robinson, E.S.J., Munafò, M.R.,  
449 2013. Power failure: Why small sample size undermines the reliability of neuroscience. *Nat.*  
450 *Rev. Neurosci.* 14, 365–376. <https://doi.org/10.1038/nrn3475>
- 451 Caeyenberghs, K., Leemans, A., 2014. Hemispheric lateralization of topological organization in  
452 structural brain networks. *Hum. Brain Mapp.* 35, 4944–4957.  
453 <https://doi.org/10.1002/hbm.22524>
- 454 Catani, M., Thiebaut de Schotten, M., Slater, D., Dell’Acqua, F., 2013. Connectomic approaches  
455 before the connectome. *Neuroimage* 80, 2–13.  
456 <https://doi.org/10.1016/j.neuroimage.2013.05.109>
- 457 Cercignani, M., Gandini Wheeler-Kingshott, C., 2019. From micro- to macro-structures in multiple  
458 sclerosis: What is the added value of diffusion imaging. *NMR Biomed.* 32, 1–10.  
459 <https://doi.org/10.1002/nbm.3888>
- 460 Chang, L.C., Jones, D.K., Pierpaoli, C., 2005. RESTORE: Robust estimation of tensors by outlier  
461 rejection. *Magn. Reson. Med.* 53, 1088–1095. <https://doi.org/10.1002/mrm.20426>
- 462 Chang, L.C., Walker, L., Pierpaoli, C., 2012. Informed RESTORE: A method for robust estimation  
463 of diffusion tensor from low redundancy datasets in the presence of physiological noise artifacts.  
464 *Magn. Reson. Med.* 68, 1654–1663. <https://doi.org/10.1002/mrm.24173>
- 465 Collier, Q., Veraart, J., Jeurissen, B., Den Dekker, A.J., Sijbers, J., 2015. Iterative reweighted linear  
466 least squares for accurate, fast, and robust estimation of diffusion magnetic resonance  
467 parameters. *Magn. Reson. Med.* 73, 2174–2184. <https://doi.org/10.1002/mrm.25351>
- 468 Collier, Q., Veraart, J., Jeurissen, B., Vanhevel, F., Pullens, P., Parizel, P.M., den Dekker, A.J.,  
469 Sijbers, J., 2018. Diffusion kurtosis imaging with free water elimination: A bayesian estimation  
470 approach. *Magn. Reson. Med.* 80, 802–813. <https://doi.org/10.1002/mrm.27075>
- 471 David, S., Heemskerk, A.M., Corrivetti, F., Thiebaut de Schotten, M., Sarubbo, S., Corsini, F., De  
472 Benedictis, A., Petit, L., Viergever, M.A., Jones, D.K., Mandonnet, E., Axer, H., Evans, J.,  
473 Paus, T., Leemans, A., 2019. The Superoanterior Fasciculus (SAF): A Novel White Matter  
474 Pathway in the Human Brain? *Front. Neuroanat.* 13, 1–18.  
475 <https://doi.org/10.3389/fnana.2019.00024>

- 476 David, S., Tax, C.M.W., Viergever, M.A., Heemskerk, A.M., Leemans, A., 2015. Choices in  
477 processing steps for diffusion MRI analyses: Does it really matter?, in: Proceedings of the  
478 International Society for Magnetic Resonance in Medicine. p. 2981.
- 479 Eierud, C., Craddock, R.C., Fletcher, S., Aulakh, M., King-Casas, B., Kuehl, D., Laconte, S.M.,  
480 2014. Neuroimaging after mild traumatic brain injury: Review and meta-analysis. *NeuroImage*  
481 *Clin.* 4, 283–294. <https://doi.org/10.1016/j.nicl.2013.12.009>
- 482 Eklund, A., Nichols, T.E., Knutsson, H., 2016. Cluster failure: Why fMRI inferences for spatial  
483 extent have inflated false-positive rates. *Proc. Natl. Acad. Sci.* 113, 7900–7905.  
484 <https://doi.org/10.1073/pnas.1602413113>
- 485 ENIGMA DTI protocol, 2018. ENIGMA DTI protocol [WWW Document]. URL  
486 <http://enigma.ini.usc.edu/protocols/dti-protocols/> (accessed 12.1.18).
- 487 Essen, D.C. Van, Ugurbil, K., Auerbach, E., Barch, D., Behrens, T.E.J.J., Bucholz, R., Chang, A.,  
488 Chen, L., Corbetta, M., Curtiss, S.W., Penna, S. Della, Feinberg, D., Glasser, M.F., Harel, N.,  
489 Heath, A.C., Larson-prior, L., Marcus, D., Michalareas, G., Moeller, S., Oostenveld, R.,  
490 Petersen, S.E., Prior, F., Schlaggar, B.L., Smith, S.M., Snyder, A.Z., Xu, J., Yacoub, E.,  
491 Consortium, W.H.C.P., Eeg, M.E.G., Van Essen, D.C., Ugurbil, K., Auerbach, E., Barch, D.,  
492 Behrens, T.E.J.J., Bucholz, R., Chang, A., Chen, L., Corbetta, M., Curtiss, S.W., Della Penna,  
493 S., Feinberg, D., Glasser, M.F., Harel, N., Heath, A.C., Larson-prior, L., Marcus, D.,  
494 Michalareas, G., Moeller, S., Oostenveld, R., Petersen, S.E., Prior, F., Schlaggar, B.L., Smith,  
495 S.M., Snyder, A.Z., Xu, J., Yacoub, E., 2012. The Human Connectome Project: A data  
496 acquisition perspective. *Neuroimage* 62, 2222–2231.  
497 <https://doi.org/10.1016/j.neuroimage.2012.02.018>
- 498 Filippini, N., Zsoldos, E., Haapakoski, R., Sexton, C.E., Mahmood, A., Allan, C.L., Topiwala, A.,  
499 Valkanova, V., Brunner, E.J., Shipley, M.J., Auerbach, E., Moeller, S., Uğurbil, K., Xu, J.,  
500 Yacoub, E., Andersson, J., Bijsterbosch, J., Clare, S., Griffanti, L., Hess, A.T., Jenkinson, M.,  
501 Miller, K.L., Salimi-Khorshidi, G., Sotiropoulos, S.N., Voets, N.L., Smith, S.M., Geddes, J.R.,  
502 Singh-Manoux, A., Mackay, C.E., Kivimäki, M., Ebmeier, K.P., 2014. Study protocol: The  
503 Whitehall II imaging sub-study. *BMC Psychiatry* 14, 159. [https://doi.org/10.1186/1471-244X-](https://doi.org/10.1186/1471-244X-14-159)  
504 14-159
- 505 Fonov, V., Evans, A.C., Botteron, K., Almli, C.R., McKinstry, R.C., Collins, D.L., 2011. Unbiased  
506 average age-appropriate atlases for pediatric studies. *Neuroimage* 54, 313–327.  
507 <https://doi.org/10.1016/j.neuroimage.2010.07.033>
- 508 Glasser, M.F., Sotiropoulos, S.N., Wilson, J.A., Coalson, T.S., Fischl, B., Andersson, J.L., Xu, J.,  
509 Jbabdi, S., Webster, M., Polimeni, J.R., Van Essen, D.C., Jenkinson, M., 2013. The minimal  
510 preprocessing pipelines for the Human Connectome Project. *Neuroimage* 80, 105–124.  
511 <https://doi.org/10.1016/j.neuroimage.2013.04.127>
- 512 Graham, M.S., Drobnyak, I., Jenkinson, M., Zhang, H., 2017. Quantitative assessment of the  
513 susceptibility artefact and its interaction with motion in diffusion MRI. *PLoS One* 12, 1–25.  
514 <https://doi.org/10.1371/journal.pone.0185647>
- 515 HCP, 2017. HCP WIKI [WWW Document]. URL  
516 <https://wiki.humanconnectome.org/display/PublicData/HCP+Data+Release+Updates%3A+Kno>

- 517 wn+Issues+and+Planned+fixes (accessed 5.10.18).
- 518 Herting, M.M., Maxwell, E.C., Irvine, C., Nagel, B.J., 2012. The impact of sex, puberty, and  
519 hormones on white matter microstructure in adolescents. *Cereb. Cortex* 22, 1979–1992.  
520 <https://doi.org/10.1093/cercor/bhr246>
- 521 Holmes, A.P., Blair, R.C., Watson, &NA; G., Ford, I., Watson, J.D.G.G., Ford, I., Watson, H.J.D.G.,  
522 Ford, I., 1996. Nonparametric Analysis of Statistic Images from Functional Mapping  
523 Experiments. *J. Cereb. Blood Flow Metab.* 16, 7–22. [https://doi.org/10.1097/00004647-](https://doi.org/10.1097/00004647-199601000-00002)  
524 [199601000-00002](https://doi.org/10.1097/00004647-199601000-00002)
- 525 Hsu, J.-L.L., Leemans, A., Bai, C.-H.H., Lee, C.-H.H., Tsai, Y.-F.F., Chiu, H.-C.C., Chen, W.-H.H.,  
526 2008. Gender differences and age-related white matter changes of the human brain: A diffusion  
527 tensor imaging study. *Neuroimage* 39, 566–577.  
528 <https://doi.org/10.1016/j.neuroimage.2007.09.017>
- 529 Ingalhalikar, M., Smith, A., Parker, D., Satterthwaite, T.D., Elliott, M.A., Ruparel, K., Hakonarson,  
530 H., Gur, R.E., Gur, R.C., Verma, R., 2014. Sex differences in the structural connectome of the  
531 human brain. *Proc. Natl. Acad. Sci.* 111, 823–828. <https://doi.org/10.1073/pnas.1316909110>
- 532 Jenkinson, M., Beckmann, C.F., Behrens, T.E.J., Woolrich, M.W., Smith, S.M., 2012. *Fsl.*  
533 *Neuroimage* 62, 782–790. <https://doi.org/10.1016/j.neuroimage.2011.09.015>
- 534 Jones, D.K., Basser, P.J., 2004. “Squashing peanuts and smashing pumpkins”: How noise distorts  
535 diffusion-weighted MR data. *Magn. Reson. Med.* 52, 979–993.  
536 <https://doi.org/10.1002/mrm.20283>
- 537 Kanaan, R.A., Allin, M., Picchioni, M., Barker, G.J., Daly, E., Shergill, S.S., Woolley, J., McGuire,  
538 P.K., 2012. Gender differences in white matter microstructure. *PLoS One* 7.  
539 <https://doi.org/10.1371/journal.pone.0038272>
- 540 Kellner, E., Dhital, B., Kiselev, V.G., Reiser, M., 2016. Gibbs-ringing artifact removal based on  
541 local subvoxel-shifts. *Magn. Reson. Med.* 76, 1574–1581. <https://doi.org/10.1002/mrm.26054>
- 542 Koay, C.G., Özarlan, E., Basser, P.J., 2009. A signal transformational framework for breaking the  
543 noise floor and its applications in MRI. *J. Magn. Reson.* 197, 108–119.  
544 <https://doi.org/10.1016/j.jmr.2008.11.015>
- 545 Kozák, L.R., David, S., Rudas, G., Vidnyánszky, Z., Leemans, A., Nagy, Z., 2013. Investigating the  
546 need of triggering the acquisition for infant diffusion MRI: A quantitative study including  
547 bootstrap statistics. *Neuroimage* 69, 198–205. <https://doi.org/10.1016/j.neuroimage.2012.11.063>
- 548 Kristoffersen, A., 2012. Estimating non-Gaussian diffusion model parameters in the presence of  
549 physiological noise and Rician signal bias. *J. Magn. Reson. Imaging* 35, 181–189.  
550 <https://doi.org/10.1002/jmri.22826>
- 551 Kristoffersen, A., 2007. Optimal estimation of the diffusion coefficient from non-averaged and  
552 averaged noisy magnitude data. *J. Magn. Reson.* 187, 293–305.  
553 <https://doi.org/10.1016/j.jmr.2007.05.004>

- 554 Leemans, A., Jeurissen, B., Sijbers, J., Jones, D.K., Jeruisen, B., Sijbers, J., Jones, D.K., 2009.  
555 ExploreDTI: a graphical toolbox for processing, analyzing, and visualizing diffusion MR data.  
556 Proc. Int. Soc. Magn. Reson. Med. 17, 3537. <https://doi.org/10.1093/occmmed/kqr069>
- 557 Leemans, A., Jones, D.K., 2009. The B-matrix must be rotated when correcting for subject motion in  
558 DTI data. Magn. Reson. Med. 61, 1336–1349. <https://doi.org/10.1002/mrm.21890>
- 559 Lunven, M., De Schotten, M.T., Bourlon, C., Duret, C., Migliaccio, R., Rode, G., Bartolomeo, P.,  
560 2015. White matter lesional predictors of chronic visual neglect: A longitudinal study. Brain  
561 138, 746–760. <https://doi.org/10.1093/brain/awu389>
- 562 Lustig, M., Donoho, D., Pauly, J.M., 2007. Sparse MRI: The application of compressed sensing for  
563 rapid MR imaging. Magn. Reson. Med. 58, 1182–1195. <https://doi.org/10.1002/mrm.21391>
- 564 McNab, J.A., Edlow, B.L., Witzel, T., Huang, S.Y., Bhat, H., Heberlein, K., Feiweier, T., Liu, K.,  
565 Keil, B., Cohen-Adad, J., Tisdall, M.D., Folkner, R.D., Kinney, H.C., Wald, L.L., 2013. The  
566 Human Connectome Project and beyond: Initial applications of 300mT/m gradients.  
567 Neuroimage 80, 234–245. <https://doi.org/10.1016/j.neuroimage.2013.05.074>
- 568 Menzler, K., Belke, M., Wehrmann, E., Krakow, K., Lengler, U., Jansen, A., Hamer, H.M., Oertel,  
569 W.H., Rosenow, F., Knake, S., 2011. Men and women are different: Diffusion tensor imaging  
570 reveals sexual dimorphism in the microstructure of the thalamus, corpus callosum and cingulum.  
571 Neuroimage 54, 2557–2562. <https://doi.org/10.1016/j.neuroimage.2010.11.029>
- 572 Mesri, H.Y., David, S., Viergever, M.A., Leemans, A., 2019. The adverse effect of gradient  
573 nonlinearities on diffusion MRI: From voxels to group studies. Neuroimage 116127.  
574 <https://doi.org/10.1016/J.NEUROIMAGE.2019.116127>
- 575 Moser, E., Laistler, E., Schmitt, F., Kontaxis, G., 2017. High Field NMR and MRI—The Role of  
576 Magnet Technology to Increase Sensitivity and Specificity. Front. Phys. 5, 33.  
577 <https://doi.org/10.3389/fphy.2017.00041>
- 578 Mueller, S.G., Weiner, M.W., Thal, L.J., Petersen, R.C., Jack, C., Jagust, W., Trojanowski, J.Q.,  
579 Toga, A.W., Beckett, L., 2005. The Alzheimer’s disease neuroimaging initiative. Neuroimaging  
580 Clin. N. Am. 15, 869–877. <https://doi.org/10.1016/j.nic.2005.09.008>
- 581 Nichols, T., Holmes, A., 2003. Nonparametric Permutation Tests for Functional Neuroimaging.  
582 Hum. Brain Funct. Second Ed. 25, 887–910. <https://doi.org/10.1016/B978-012264841-0/50048-2>
- 584 Nir, T.M., Jahanshad, N., Villalon-Reina, J.E., Toga, A.W., Jack, C.R., Weiner, M.W., Thompson,  
585 P.M., 2013. Effectiveness of regional DTI measures in distinguishing Alzheimer’s disease,  
586 MCI, and normal aging. NeuroImage Clin. 3, 180–195.  
587 <https://doi.org/10.1016/j.nicl.2013.07.006>
- 588 Nosek, B.A., Lakens, D., 2014. Registered reports: A method to increase the credibility of published  
589 results. Soc. Psychol. (Gott). 45, 137–141. <https://doi.org/10.1027/1864-9335/a000192>
- 590 Novikov, D.S., Fieremans, E., Jespersen, S.N., Kiselev, V.G., 2019. Quantifying brain microstructure  
591 with diffusion MRI: Theory and parameter estimation. NMR Biomed. 32, e3998.

- 592 <https://doi.org/10.1002/nbm.3998>
- 593 Núñez, C., Theofanopoulou, C., Senior, C., Cambra, M.R., Usall, J., Stephan-otto, C., Brébion, G.,  
594 Nu, C., Cambra, M.R., Usall, J., Stephan-otto, C., Bre, G., 2017. A large-scale study on the  
595 effects of sex on gray matter asymmetry. *Brain Struct. Funct.* 1–11.  
596 <https://doi.org/10.1007/s00429-017-1481-4>
- 597 Owen, J.P., Marco, E.J., Desai, S., Fourie, E., Harris, J., Hill, S.S., Arnett, A.B., Mukherjee, P., 2013.  
598 Abnormal white matter microstructure in children with sensory processing disorders.  
599 *NeuroImage Clin.* 2, 844–853. <https://doi.org/10.1016/j.nicl.2013.06.009>
- 600 Pannek, K., Raffelt, D., Bell, C., Mathias, J.L., Rose, S.E., 2012. HOMOR: Higher Order Model  
601 Outlier Rejection for high b-value MR diffusion data. *Neuroimage* 63, 835–842.  
602 <https://doi.org/10.1016/j.neuroimage.2012.07.022>
- 603 Penny, W., Friston, K., Ashburner, J., Kiebel, S., Nichols, T., 2007. *Statistical Parametric Mapping:  
604 The Analysis of Functional Brain Images.* Elsevier. [https://doi.org/10.1016/B978-0-12-372560-  
605 8.X5000-1](https://doi.org/10.1016/B978-0-12-372560-8.X5000-1)
- 606 Perrone, D., Aelterman, J., Pižurica, A., Jeurissen, B., Philips, W., Leemans, A., 2015. The effect of  
607 Gibbs ringing artifacts on measures derived from diffusion MRI. *Neuroimage* 120, 441–455.  
608 <https://doi.org/10.1016/j.neuroimage.2015.06.068>
- 609 Phillips, O.R., Joshi, S.H., Piras, F., Orfei, M.D., Iorio, M., Narr, K.L., Shattuck, D.W., Caltagirone,  
610 C., Spalletta, G., Di Paola, M., 2016. The superficial white matter in Alzheimer’s disease. *Hum.  
611 Brain Mapp.* 37, 1321–1334. <https://doi.org/10.1002/hbm.23105>
- 612 Poldrack, R.A., 2012. The future of fMRI in cognitive neuroscience. *Neuroimage* 62, 1216–1220.  
613 <https://doi.org/10.1016/j.neuroimage.2011.08.007>
- 614 Poldrack, R.A., Baker, C.I., Durnez, J., Gorgolewski, K.J., Matthews, P.M., Munafò, M.R., Nichols,  
615 T.E., Poline, J.B., Vul, E., Yarkoni, T., 2017. Scanning the horizon: Towards transparent and  
616 reproducible neuroimaging research. *Nat. Rev. Neurosci.* 18, 115–126.  
617 <https://doi.org/10.1038/nrn.2016.167>
- 618 Ritchie, S.J., Cox, S.R., Shen, X., Lombardo, M. V, Reus, L.M., Alloza, C., Harris, M.A., Alderson,  
619 H.L., Hunter, S., Neilson, E., Liewald, D.C.M., Auyeung, B., Whalley, H.C., Lawrie, S.M.,  
620 Gale, C.R., Bastin, M.E., McIntosh, A.M., Deary, I.J., 2018. Sex Differences in the Adult  
621 Human Brain: Evidence from 5216 UK Biobank Participants. *Cereb. Cortex* 28, 2959–2975.  
622 <https://doi.org/10.1093/cercor/bhy109>
- 623 Rothstein, H.R., Sutton, A.J., Borenstein, M., 2006. *Publication Bias in Meta-Analysis: Prevention,  
624 Assessment and Adjustments, Publication Bias in Meta-Analysis: Prevention, Assessment and  
625 Adjustments.* Wiley. <https://doi.org/10.1002/0470870168>
- 626 Rousselet, G.A., Pernet, C.R., Wilcox, R.R., 2017. Beyond differences in means: robust graphical  
627 methods to compare two groups in neuroscience. *Eur. J. Neurosci.* 46, 1738–1748.  
628 <https://doi.org/10.1111/ejn.13610>
- 629 Rudie, J.D., Brown, J.A., Beck-Pancer, D., Hernandez, L.M., Dennis, E.L., Thompson, P.M.,

- 630 Bookheimer, S.Y., Dapretto, M., 2013. Altered functional and structural brain network  
631 organization in autism. *NeuroImage Clin.* 2, 79–94. <https://doi.org/10.1016/j.nicl.2012.11.006>
- 632 Sabia, S., Dugravot, A., Dartigues, J.F., Abell, J., Elbaz, A., Kivimäki, M., Singh-Manoux, A., 2017.  
633 Physical activity, cognitive decline, and risk of dementia: 28 year follow-up of Whitehall II  
634 cohort study. *BMJ* 357, j2709. <https://doi.org/10.1136/bmj.j2709>
- 635 Salvador, R., Peña, A., Menon, D.K., Carpenter, T.A., Pickard, J.D., Bullmore, E.T., 2005. Formal  
636 characterization and extension of the linearized diffusion tensor model. *Hum. Brain Mapp.* 24,  
637 144–155. <https://doi.org/10.1002/hbm.20076>
- 638 Schwarz, S.T., Abaei, M., Gontu, V., Morgan, P.S., Bajaj, N., Auer, D.P., 2013. Diffusion tensor  
639 imaging of nigral degeneration in Parkinson’s disease: A region-of-interest and voxel-based  
640 study at 3 T and systematic review with meta-analysis. *NeuroImage Clin.* 3, 481–488.  
641 <https://doi.org/10.1016/j.nicl.2013.10.006>
- 642 Setsompop, K., Kimmlingen, R., Eberlein, E., Witzel, T., Cohen-Adad, J., McNab, J.A., Keil, B.,  
643 Tisdall, M.D., Hoecht, P., Dietz, P., Cauley, S.F., Tountcheva, V., Matschl, V., Lenz, V.H.,  
644 Heberlein, K., Potthast, A., Thein, H., Van Horn, J., Toga, A., Schmitt, F., Lehne, D., Rosen,  
645 B.R., Wedeen, V., Wald, L.L., 2013. Pushing the limits of in vivo diffusion MRI for the Human  
646 Connectome Project. *Neuroimage* 80, 220–233.  
647 <https://doi.org/10.1016/j.neuroimage.2013.05.078>
- 648 Smaldino, P.E., McElreath, R., 2016. the Natural Selection of Bad Science. *R. Soc. Open Sci.* 3, 1–  
649 20. <https://doi.org/10.1098/rsos.160384>
- 650 Smith, S.M., Jenkinson, M., Johansen-Berg, H., Rueckert, D., Nichols, T.E., Mackay, C.E., Watkins,  
651 K.E., Ciccarelli, O., Cader, M.Z., Matthews, P.M., Behrens, T.E.J., 2006. Tract-based spatial  
652 statistics: Voxelwise analysis of multi-subject diffusion data. *Neuroimage* 31, 1487–1505.  
653 <https://doi.org/10.1016/j.neuroimage.2006.02.024>
- 654 Smith, S.M., Nichols, T.E., 2018. Statistical Challenges in “Big Data” Human Neuroimaging.  
655 *Neuron* 97, 263–268. <https://doi.org/10.1016/j.neuron.2017.12.018>
- 656 Smith, S.M., Nichols, T.E., 2009. Threshold-free cluster enhancement: Addressing problems of  
657 smoothing, threshold dependence and localisation in cluster inference. *Neuroimage* 44, 83–98.  
658 <https://doi.org/10.1016/j.neuroimage.2008.03.061>
- 659 Sotiropoulos, S.N., Jbabdi, S., Xu, J., Andersson, J.L., Moeller, S., Auerbach, E.J., Glasser, M.F.,  
660 Hernandez, M., Sapiro, G., Jenkinson, M., Feinberg, D.A., Yacoub, E., Lenglet, C., Van Essen,  
661 D.C., Ugurbil, K., Behrens, T.E.J., 2013. Advances in diffusion MRI acquisition and processing  
662 in the Human Connectome Project. *Neuroimage* 80, 125–143.  
663 <https://doi.org/10.1016/j.neuroimage.2013.05.057>
- 664 St-Jean, S., Coupé, P., Descoteaux, M., 2016. Non Local Spatial and Angular Matching: Enabling  
665 higher spatial resolution diffusion MRI datasets through adaptive denoising. *Med. Image Anal.*  
666 32, 115–130. <https://doi.org/10.1016/j.media.2016.02.010>
- 667 Sudlow, C., Gallacher, J., Allen, N., Beral, V., Burton, P., Danesh, J., Downey, P., Elliott, P., Green,  
668 J., Landray, M., Liu, B., Matthews, P., Ong, G., Pell, J., Silman, A., Young, A., Sprosen, T.,

- 669 Peakman, T., Collins, R., 2015. UK Biobank: An Open Access Resource for Identifying the  
670 Causes of a Wide Range of Complex Diseases of Middle and Old Age. *PLoS Med.* 12, 1001779.  
671 <https://doi.org/10.1371/journal.pmed.1001779>
- 672 Tax, C.M.W., Otte, W.M., Viergever, M.A., Dijkhuizen, R.M., Leemans, A., 2015. REKINDLE:  
673 Robust Extraction of Kurtosis INDices with Linear Estimation. *Magn. Reson. Med.* 73, 794–  
674 808. <https://doi.org/10.1002/mrm.25165>
- 675 Thiebaut de Schotten, M., Dell’Acqua, F., Valabregue, R., Catani, M., 2012. Monkey to human  
676 comparative anatomy of the frontal lobe association tracts. *Cortex* 48, 82–96.  
677 <https://doi.org/10.1016/j.cortex.2011.10.001>
- 678 Thompson, P.M., Hibar, D.P., Stein, J.L., Prasad, G., Jahanshad, N., 2016. Genetics of the  
679 connectome and the ENIGMA project, in: *Research and Perspectives in Neurosciences*.  
680 Springer, Cham, pp. 147–164. [https://doi.org/10.1007/978-3-319-27777-6\\_10](https://doi.org/10.1007/978-3-319-27777-6_10)
- 681 Thompson, P.M., Stein, J.L., Medland, S.E., Hibar, D.P., Vasquez, A.A., Renteria, M.E., Toro, R.,  
682 Jahanshad, N., Schumann, G., Franke, B., Wright, M.J., Martin, N.G., Agartz, I., Alda, M.,  
683 Alhusaini, S., Almasy, L., Almeida, J., Alpert, K., Andreasen, N.C., Andreassen, O.A.,  
684 Apostolova, L.G., Appel, K., Armstrong, N.J., Aribisala, B., Bastin, M.E., Bauer, M., Bearden,  
685 C.E., Bergmann, Ø., Binder, E.B., Blangero, J., Bockholt, H.J., Bøen, E., Bois, C., Boomsma,  
686 D.I., Booth, T., Bowman, I.J., Bralten, J., Brouwer, R.M., Brunner, H.G., Brohawn, D.G.,  
687 Buckner, R.L., Buitelaar, J., Bulayeva, K., Bustillo, J.R., Calhoun, V.D., Cannon, D.M., Cantor,  
688 R.M., Carless, M.A., Caseras, X., Cavalleri, G.L., Chakravarty, M.M., Chang, K.D., Ching,  
689 C.R.K., Christoforou, A., Cichon, S., Clark, V.P., Conrod, P., Coppola, G., Crespo-Facorro, B.,  
690 Curran, J.E., Czisch, M., Deary, I.J., de Geus, E.J.C., den Braber, A., Delvecchio, G., Depondt,  
691 C., de Haan, L., de Zubicaray, G.I., Dima, D., Dimitrova, R., Djurovic, S., Dong, H., Donohoe,  
692 G., Duggirala, R., Dyer, T.D., Ehrlich, S., Ekman, C.J., Elvsåshagen, T., Emsell, L., Erk, S.,  
693 Espeseth, T., Fagerness, J., Fears, S., Fedko, I., Fernández, G., Fisher, S.E., Foroud, T., Fox,  
694 P.T., Francks, C., Frangou, S., Frey, E.M., Frodl, T., Frouin, V., Garavan, H., Giddaluru, S.,  
695 Glahn, D.C., Godlewska, B., Goldstein, R.Z., Gollub, R.L., Grabe, H.J., Grimm, O., Gruber, O.,  
696 Guadalupe, T., Gur, R.E., Gur, R.C., Göring, H.H.H., Hagenaars, S., Hajek, T., Hall, G.B., Hall,  
697 J., Hardy, J., Hartman, C.A., Hass, J., Hatton, S.N., Haukvik, U.K., Hegenscheid, K., Heinz, A.,  
698 Hickie, I.B., Ho, B.C., Hoehn, D., Hoekstra, P.J., Hollinshead, M., Holmes, A.J., Homuth, G.,  
699 Hoogman, M., Hong, L.E., Hosten, N., Hottenga, J.J., Hulshoff Pol, H.E., Hwang, K.S., Jack,  
700 C.R., Jenkinson, M., Johnston, C., Jönsson, E.G., Kahn, R.S., Kasperaviciute, D., Kelly, S.,  
701 Kim, S., Kochunov, P., Koenders, L., Krämer, B., Kwok, J.B.J., Lagopoulos, J., Laje, G.,  
702 Landen, M., Landman, B.A., Lauriello, J., Lawrie, S.M., Lee, P.H., Le Hellard, S., Lemaître, H.,  
703 Leonardo, C.D., Li, C. shan, Liberg, B., Liewald, D.C., Liu, X., Lopez, L.M., Loth, E.,  
704 Lourdasamy, A., Luciano, M., Macciardi, F., Machielsen, M.W.J., MacQueen, G.M., Malt,  
705 U.F., Mandl, R., Manoach, D.S., Martinot, J.L., Matarin, M., Mather, K.A., Mattheisen, M.,  
706 Mattingsdal, M., Meyer-Lindenberg, A., McDonald, C., McIntosh, A.M., McMahon, F.J.,  
707 McMahon, K.L., Meisenzahl, E., Melle, I., Milaneschi, Y., Mohnke, S., Montgomery, G.W.,  
708 Morris, D.W., Moses, E.K., Mueller, B.A., Muñoz Maniega, S., Mühleisen, T.W., Müller-  
709 Myhsok, B., Mwangi, B., Nauck, M., Nho, K., Nichols, T.E., Nilsson, L.G., Nugent, A.C.,  
710 Nyberg, L., Olvera, R.L., Oosterlaan, J., Ophoff, R.A., Pandolfo, M., Papalampropoulou-  
711 Tsiridou, M., Pappmeyer, M., Paus, T., Pausova, Z., Pearlson, G.D., Penninx, B.W., Peterson,  
712 C.P., Pfennig, A., Phillips, M., Pike, G.B., Poline, J.B., Potkin, S.G., Pütz, B., Ramasamy, A.,  
713 Rasmussen, J., Rietschel, M., Rijpkema, M., Risacher, S.L., Roffman, J.L., Roiz-Santiañez, R.,



- 714 Romanczuk-Seiferth, N., Rose, E.J., Royle, N.A., Rujescu, D., Ryten, M., Sachdev, P.S.,  
715 Salami, A., Satterthwaite, T.D., Savitz, J., Saykin, A.J., Scanlon, C., Schmaal, L., Schnack,  
716 H.G., Schork, A.J., Schulz, S.C., Schür, R., Seidman, L., Shen, L., Shoemaker, J.M., Simmons,  
717 A., Sisodiya, S.M., Smith, C., Smoller, J.W., Soares, J.C., Sponheim, S.R., Sprooten, E., Starr,  
718 J.M., Steen, V.M., Strakowski, S., Strike, L., Sussmann, J., Sämann, P.G., Teumer, A., Toga,  
719 A.W., Tordesillas-Gutierrez, D., Trabzuni, D., Trost, S., Turner, J., Van den Heuvel, M., van der  
720 Wee, N.J., van Eijk, K., van Erp, T.G.M., van Haren, N.E.M., van 't Ent, D., van Tol, M.J.,  
721 Valdés Hernández, M.C., Veltman, D.J., Versace, A., Völzke, H., Walker, R., Walter, H., Wang,  
722 L., Wardlaw, J.M., Weale, M.E., Weiner, M.W., Wen, W., Westlye, L.T., Whalley, H.C.,  
723 Whelan, C.D., White, T., Winkler, A.M., Wittfeld, K., Woldehawariat, G., Wolf, C., Zilles, D.,  
724 Zwiers, M.P., Thalamuthu, A., Schofield, P.R., Freimer, N.B., Lawrence, N.S., Drevets, W.,  
725 2014. The ENIGMA Consortium: Large-scale collaborative analyses of neuroimaging and  
726 genetic data. *Brain Imaging Behav.* 8, 153–182. <https://doi.org/10.1007/s11682-013-9269-5>
- 727 Tyan, Y.S., Liao, J.R., Shen, C.Y., Lin, Y.C., Weng, J.C., 2017. Gender differences in the structural  
728 connectome of the teenage brain revealed by generalized q-sampling MRI. *NeuroImage Clin.*  
729 15, 376–382. <https://doi.org/10.1016/j.nicl.2017.05.014>
- 730 Veraart, J., Fieremans, E., Jelescu, I.O., Knoll, F., Novikov, D.S., 2016a. Gibbs ringing in diffusion  
731 MRI. *Magn. Reson. Med.* 76, 301–314. <https://doi.org/10.1002/mrm.25866>
- 732 Veraart, J., Hecke, W. Van, Sijbers, J., Van Hecke, W., Sijbers, J., 2011. Constrained maximum  
733 likelihood estimation of the diffusion kurtosis tensor using a Rician noise model. *Magn. Reson.*  
734 *Med.* 66, 678–686. <https://doi.org/10.1002/mrm.22835>
- 735 Veraart, J., Novikov, D.S., Christiaens, D., Ades-aron, B., Sijbers, J., Fieremans, E., 2016b.  
736 Denoising of diffusion MRI using random matrix theory. *Neuroimage* 142, 394–406.  
737 <https://doi.org/10.1016/j.neuroimage.2016.08.016>
- 738 Veraart, J., Rajan, J., Peeters, R.R., Leemans, A., Sunaert, S., Sijbers, J., 2013a. Comprehensive  
739 framework for accurate diffusion MRI parameter estimation. *Magn. Reson. Med.* 70, 972–984.  
740 <https://doi.org/10.1002/mrm.24529>
- 741 Veraart, J., Sijbers, J., Sunaert, S., Leemans, A., Jeurissen, B., 2013b. Weighted linear least squares  
742 estimation of diffusion MRI parameters: Strengths, limitations, and pitfalls. *Neuroimage* 81,  
743 335–346. <https://doi.org/10.1016/j.neuroimage.2013.05.028>
- 744 Vos, S.B., Tax, C.M.W., Luijten, P.R., Ourselin, S., Leemans, A., Froeling, M., 2017. The  
745 importance of correcting for signal drift in diffusion MRI. *Magn. Reson. Med.* 77, 285–299.  
746 <https://doi.org/10.1002/mrm.26124>
- 747 Wasserstein, R.L., Lazar, N.A., 2016. The ASA's Statement on *p* -Values: Context, Process, and  
748 Purpose. *Am. Stat.* 70, 129–133. <https://doi.org/10.1080/00031305.2016.1154108>
- 749 Westerhausen, R., Walter, C., Kreuder, F., Wittling, R.A., Schweiger, E., Wittling, W., 2003. The  
750 influence of handedness and gender on the microstructure of the human corpus callosum: A  
751 diffusion-tensor magnetic resonance imaging study. *Neurosci. Lett.* 351, 99–102.  
752 <https://doi.org/10.1016/j.neulet.2003.07.011>
- 753 Wierenga, L.M., Sexton, J.A., Laake, P., Giedd, J.N., Tamnes, C.K., 2017. A Key Characteristic of

- 754 Sex Differences in the Developing Brain: Greater Variability in Brain Structure of Boys than  
755 Girls. *Cereb. Cortex* 1–11. <https://doi.org/10.1093/cercor/bhx154>
- 756 Wilcox, R.R., 2012. *Introduction to robust estimation and hypothesis testing*. Academic Press.
- 757 Winkler, A.M., Ridgway, G.R., Douaud, G., Nichols, T.E., Smith, S.M., 2016. Faster permutation  
758 inference in brain imaging. *Neuroimage* 141, 502–516.  
759 <https://doi.org/10.1016/j.neuroimage.2016.05.068>
- 760 Winkler, A.M., Ridgway, G.R., Webster, M.A., Smith, S.M., Nichols, T.E., 2014. Permutation  
761 inference for the general linear model. *Neuroimage* 92, 381–397.  
762 <https://doi.org/10.1016/j.neuroimage.2014.01.060>
- 763

764 **Supplementary Figures**

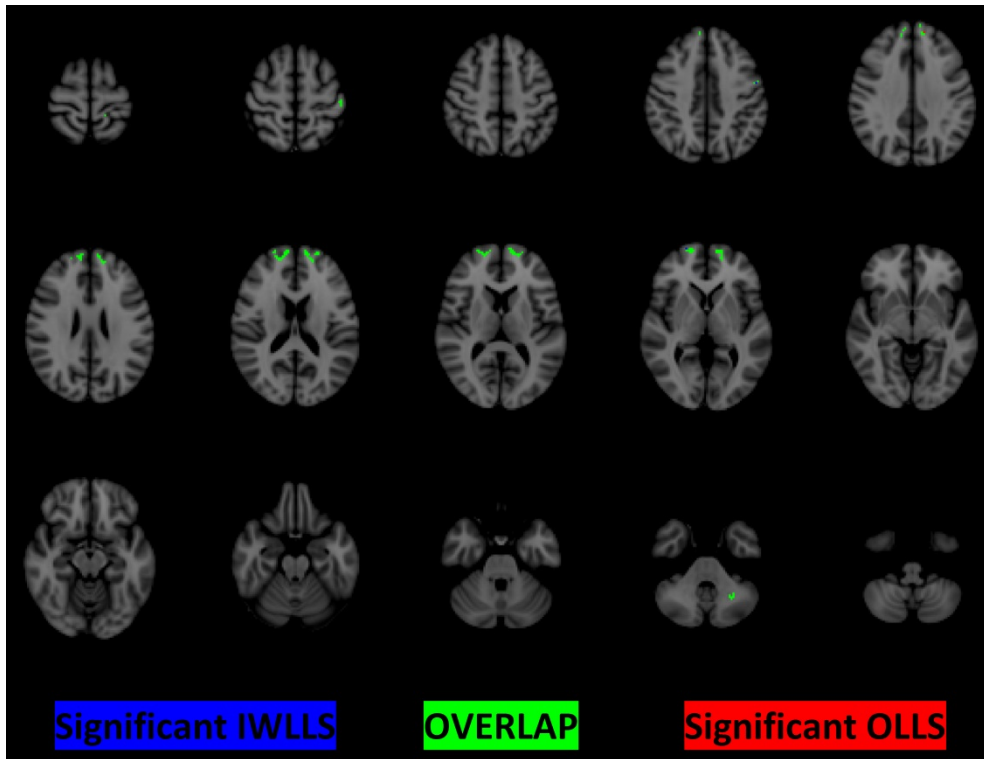

765

766 Suppl. Fig. 1 Results of the voxelwise analysis, indicating the regions where the FA is significantly  
767 higher for males than for females. Voxels colored in red and blue represent the regions where the FA  
768 estimates were obtained with the OLLS and IWLLS estimators, respectively (only visible in a few  
769 voxels). The green voxels show their overlap, i.e., the regions where both OLLS and IWLLS reflect  
770 significantly higher FA values for males compared to females.
